# Supplementary material for: Variations of Growth and Toxin Yield in Cylindrospermopsis raciborskii under Different Phosphorus Concentrations
Source: Toxins (Basel). 2016 Dec 29;9(1):13. doi: 10.3390/toxins9010013 (PMC5307294; doi:10.3390/toxins9010013)
Supplement: Supplementary file 1 [file toxins-09-00013-s001.xlsx]

## Sheet: Sheet1
Table S1 Details of field samples
Geographic origin	Sampling sites	Latitude (N), Longitude (E)	Date of sample	TP concentration (mg L-1)	Cyanobacterial biomass (mg L-1)
					Cylindrospermopsis	Microcystis	Total cyanobacteria
Huanghu Lake, Susong, Anhui	2	30°01', 116°19'	June, 2013	0.108	0.0480035	0.0272745	0.233192
		30°01', 116°21'		0.075	0.05868	0	0.116615
Changhu Lake, Jingzhou, Hubei	1	30°27', 112°26'	June, 2013	0.063	0.379365	0.685563	2.09733
Futou Lake, Xianning, Hubei	1	30°00', 114°16'	June, 2013	0.0437252	0.076415	0.0199875	0.363284
Honghu Lake, Honghu, Hubei	1	29°55', 113°25'	June, 2013	0.079949	0.142054	0.183316	1.6063
Niushan Lake, Wuhan, Hubei	2	30°20', 114°32'	June, 2013	0.084	0.115459	0.59685	1.81631
		30°19', 114°33'		0.084	0.90626	1.91822	3.83138
Sanshan Lake, Ezhou, Hubei	2	30°19', 114°45'	June, 2013	0.033	1.07212	0.0366481	3.09989
		30°18', 114°46'		0.062	0.384863	0.00586369	1.91669
Xiliang Lake, Xianning, Hubei	1	29°58', 114°04'	June, 2013	0.042	0.106034	0.0753903	1.61105
Dongting Lake, Yueyang, Hunan	3	29°51', 112°15'	May, 2013	0.0624	0.00574746	0	0.0081466
		28°53', 112°20'		0.0665	0.00800072	0	0.0270501
		29°17', 112°58'		0.068	0.0121219	0.0624672	0.15088
Yueyang Southern Lake, Yueyang, Hunan	1	29°20', 113°07'	May, 2013	0.124	0.0271698	0	0.371139
Baima Lake, Huaian, Jiangsu	4	33°16', 119°07'	Apr., 2013	0.1375	0.0100049	0.0949883	0.926269
		33°15', 119°08'		0.065	0.018256	0.061248	0.146422
		33°14', 119°08'		0.06125	0.242939	0.698349	3.87151
		33°14', 119°07'		0.075	0.111651	0.37632	1.25157
Changdang Lake, Liyang, Jiangsu	1	31°37', 119°33'	Apr., 2013	0.28568	0.105001	2.83019	12.0022
Gaoyou Lake, Gaoyou, Jiangsu	3	32°52', 119°18'	Apr., 2013	0.20267	0.0106075	0.22392	0.24167
		32°55', 119°18'		0.175971	0.0247864	0.0287142	0.185255
		32°53', 119°21'		0.23665	0.0055257	0.0990965	0.434429
Gucheng Lake, Nanjing, Jiangsu	4	31°18', 118°53'	Apr., 2013	0.042961	6.24066	0.904103	11.7657
		31°17', 118°56'		0.036893	8.98881	0.55454	11.2513
		31°15', 118°55'		0.025971	8.74788	1.57018	13.3667
		31°16', 118°55'		0.028398	6.77452	0.576582	9.22227
Kuncheng Lake, Changshu, Jiangsu	1	31°34', 120°44'	Apr., 2013	0.13	0.0125918	0.120973	0.552804
Luoma Lake, Suqian, Jiangsu	4	34°03', 118°13'	Apr., 2013	0.030637	1.48581	0	4.63471
		34°05', 118°08'		0.023284	0.837712	0.218593	5.16728
		34°07', 118°11'		0.044118	0.00352623	0.00657024	0.0339205
		34°03', 118°08'		0.051471	0.193954	0.235688	0.976836
Shaobo Lake, Yangzhou, Jiangsu	3	32°31', 119°29'	Apr., 2013	0.15534	0.0073024	0.0376118	1.75779
		32°34', 119°27'		0.125	0.05542	0.198708	4.00695
		32°39', 119°24'		0.144417	0.0164304	0.0260896	0.262896
Shijiu Lake, Nanjing, Jiangsu	4	31°27', 118°53'	Apr., 2013	0.058894	7.43363	0.642803	12.4611
		31°28', 118°52'		0.067308	7.08182	0.870643	9.00612
		31°30', 118°53'		0.08774	2.81665	1.55212	6.13134
		31°30', 118°56'		0.105769	3.08301	0.705227	7.67943
Weishan Lake, Xuzhou, Jiangsu	4	34°37', 117°16'	Apr., 2013	0.026961	9.34393	0.467647	13.823
				0.044118	15.6812	0.927387	25.7443
				0.079657	27.7821	2.34784	39.1435
				0.044118	36.0032	1.10598	45.1556
Junshan Lake, Nanchang, Jiangxi	7	28°36', 116°18'	Sept., 2013	0.0765	0.542624	1.58983	3.04342
		28°32', 116°21'		0.0665	0.918155	1.20388	2.96506
		28°32', 116°22'		0.0725	0.825477	0.74832	2.5491
		28°33', 116°18'		0.0585	0.508385	1.33694	2.40518
		28°30', 116°18'		0.0745	0.0615014	0.783977	1.29176
		28°30', 116°19'		0.0985	0.320087	0.825108	1.84501
		28°32', 116°18'		0.0925	0.143237	0.647376	1.2378
Poyang Lake, Nanchang, Jiangxi	1	29°07', 116°14'	Sept., 2013	0.0725	0.00361082	0.00787986	0.0803641
Qili Lake, Jiujiang, Jiangxi	1	29°40', 115°55'	Sept., 2013	0.3528	0.00227021	0.106734	0.386422
Xinmiao Lake, Jiujiang, Jiangxi	1	29°21', 116°09'	Sept., 2013	0.2146	0.00129726	0.00415061	0.151649
Zhuhu Lake, Nanchang, Jiangxi	3	29°07', 116°38'	Sept., 2013	0.0645	0.00733127	0.00244339	0.175161
		29°08', 116°38'		0.0765	0.0129024	0.0436527	0.437151
		29°09', 116°41'		0.1085	0.0091698	0.0625287	0.363872
